# Supplementary material for: Topochemical synthesis of phase-pure Mo2AlB2 through staging mechanism
Source: Royal Society of Chemistry journal article supplement (doi:10.1039/c9cc03855h), 2019-01-01
Supplement: c9cc03855h1.pdf [file c9cc03855h1.pdf]

## Electronic Supplementary Information

# Topochemical Synthesis of Phase-Pure $\text{Mo}_2\text{AlB}_2$ through Staging Mechanism

Kijae Kim,<sup>‡a</sup> Chi Chen,<sup>‡a</sup> Daisuke Nishio-Hamane,<sup>b</sup> Masashi Okubo,<sup>ac</sup> and Atsuo Yamada,<sup>\*ac</sup>

<sup>a</sup> Department of Chemical System Engineering, School of Engineering, The University of Tokyo, 7-3-1, Hongo, Bunkyo-ku, Tokyo 113-8656, Japan

<sup>b</sup> Institute for Solid State Physics, The University of Tokyo, Kashiwanoha 5-1-5, Kashiwa, Chiba 277-8581, Japan

<sup>c</sup> Elemental Strategy Initiative for Catalysts & Batteries (ESICB), Kyoto University, Nishikyo-ku, Kyoto 615-8510, Japan

<sup>‡</sup> Authors contributed equally to this manuscript.

\*E-mail: yamada@chemsys.t.u-tokyo.ac.jp

## EXPERIMENTAL SECTION

**Synthesis of MoAlB.** The mixture of MoB (High Purity Chemicals, Japan) and Al (High Purity Chemicals, Japan) was pelletized under 40 MPa pressure and heated to 1200 °C for 1 h under Ar atmosphere using a high-frequency induction furnace. The heated pellet was powdered by milling with zirconia balls.

**Synthesis of Mo<sub>2</sub>AlB<sub>2</sub>.** 500 mg of MoAlB powder was slowly poured into a solution consisting of 2.3 g (3 M) of LiF (Wako Chemicals, Japan) and 30 mL of 10 M HCl (Kanto Chemicals, Japan). The mixture was continuously stirred for 48 h at 40 °C. The resulting precipitate was stirred in a 1 M HCl solution, then filtered, washed with deionized water until the pH reaches to neutral. The separated powder was dried at 60 °C for 12 h under vacuum.

**Material Characterization.** Crystal structures of the obtained materials were analyzed by X-ray diffraction (Rigaku, RINT-TTR III) in the  $2\theta$  range of 3–80° with a step size of 0.02° using Cu  $K\alpha$  radiation. SEM and TEM images of the obtained materials were collected using a scanning electron microscope (Hitachi, S-4800) and transmission electron microscopy (JEOL, JEM-2100 and JEM-2800), respectively. Chemical composition was determined with energy-dispersive X-ray spectroscopy (JEOL, JEM-6510LA and Oxford X-Max).

**Calculation.** First-principle calculations were performed using Vienna Ab-initio Simulation Package (VASP),<sup>1</sup> based on density-functional theory (DFT).<sup>2,3</sup> The exchange–correlation energy is calculated using general gradient approximation (GGA) with the Perdew–Burke–Ernzerhof (PBE) exchange–correlation functional.<sup>4</sup> The plane wave cutoff energy is 500 eV. The convergence condition for the energy is  $10^{-4}$  eV, and the structures were relaxed until the force on each atom was less than 0.01 eV/Å. Spin polarization was considered in all calculations. A  $3 \times 3$  slab was chosen to calculate the formation energies of Al removal from MoAlB phase. The  $c$  axis parameter was set as 40 Å to ensure

enough vacuum to avoid interactions between two periods, and the  $k$ -point meshes of  $3 \times 3 \times 1$  and  $6 \times 6 \times 1$  in the Monkhorst Pack<sup>5</sup> sampling scheme were used for geometry optimization and electronic self-consistent computation, respectively. The crystal structures were drawn using VESTA.<sup>6</sup> For the first three steps in **Figure 3**, the energy to generate an Al defect from MoAlB phase is defined as,  $E = E_f - E_i + E_{Al}$ , where  $E_f$ ,  $E_i$ , and  $E_{Al}$  are the formation energies of the phase after Al removal, the phase before Al removal, and an elemental Al atom, respectively. For the Stage I and Stage II in **Figure 3**, the energy to remove an Al layer from MoAlB is defined as,  $E = (E_s - E_i + N \cdot E_{Al})/N$ , where  $E_s$  and  $E_i$  are the formation energies of the phases after and before Al removal, and  $N$  is the number of Al atoms in an Al layer.

## References

- 1 G. Kresse and J. Hafner, *Phys. Rev. B*, 1994, **49**, 14251.
- 2 P. Hohenberg, *Phys. Rev.*, 1964, **136**, B864.
- 3 W. Kohn and L. J. Sham, *Phys. Rev.*, **140**, A1133.
- 4 J. P. Perdew, K. Burke and M. Ernzerhof, *Phys. Rev. Lett.*, 1996, **77**, 3865.
- 5 H. J. Monkhorst and J. D. Pack, *Phys. Rev. B*, 1976, **13**, 5188.
- 6 K. Momma and F. Izumi, *J. Appl. Cryst.*, 2008, **41**, 653.

**Table S1.** EDX results for MoAlB and Mo<sub>2</sub>AlB<sub>2</sub>.

|                                               | Mo<br>atomic% | Al<br>atomic% | O<br>atomic% |
|-----------------------------------------------|---------------|---------------|--------------|
| MoAlB                                         | 46.0±3        | 43.7±2        | 10.3±2       |
| Mo <sub>2</sub> AlB <sub>2</sub><br>(LiF/HCl) | 58.9±5        | 27.1±5        | 14.0±4       |

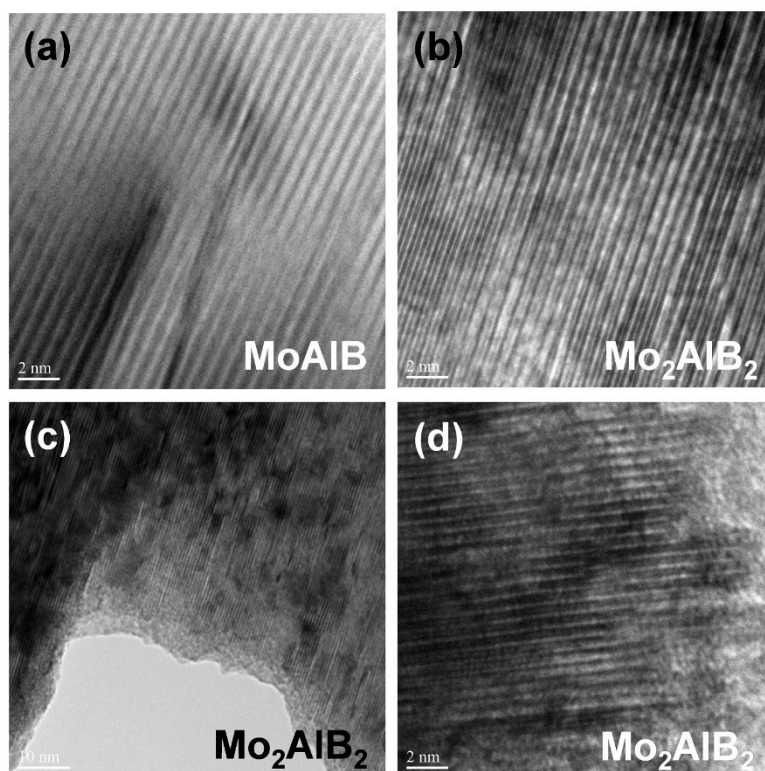

**Figure S1.** TEM images for (a) MoAlB and (b-d) Mo<sub>2</sub>AlB<sub>2</sub>.

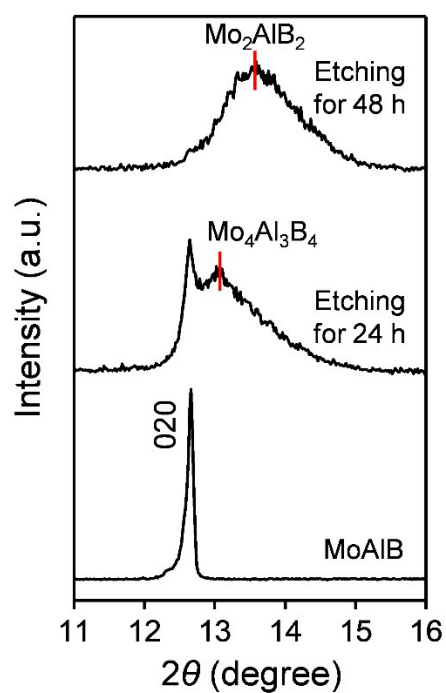

**Fig. S2** Powder X-ray diffraction patterns for MoAlB, the sample after 24 h etching, and the sample after 48 h etching. After 24 h etching, a new diffraction peak appears at  $2\theta = 13^\circ$ , corresponding to the interlayer distance of  $d_{\text{inter}} = 6.8 \text{ \AA}$  (presumably,  $\text{Mo}_4\text{Al}_3\text{B}_4$ ). Based on the calculation results, staging transformation from MoAlB through  $\text{Mo}_4\text{Al}_3\text{B}_4$  to  $\text{Mo}_2\text{AlB}_2$  should occur.
